# Supplementary material for: Dye Plants Derived Carbon Dots for Flexible Secure Printing
Source: MDPI journal article supplement (doi:10.3390/nano12183168), 2022-09-13
Supplement: s1 [file s1]

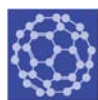

## Supplementary Materials

## Dye Plants Derived Carbon Dots for Flexible Secure Printing

Linlin Li <sup>1</sup>, Yuanyuan Han <sup>1</sup>, Lihua Wang <sup>2</sup>, Wei Jiang <sup>1,\*</sup> and Haiguang Zhao <sup>2,\*</sup><sup>1</sup> College of Textiles & Clothing, Qingdao University, No. 308 Ningxia Road, Qingdao 266071, China<sup>2</sup> State Key Laboratory of Bio-Fibers and Eco-Textiles, College of Physics, Qingdao University, No. 308 Ningxia Road, Qingdao 266071, China

\* Correspondence: weijiangqd@qdu.edu.cn (W.J.); hgzhao@qdu.edu.cn (H.Z.)

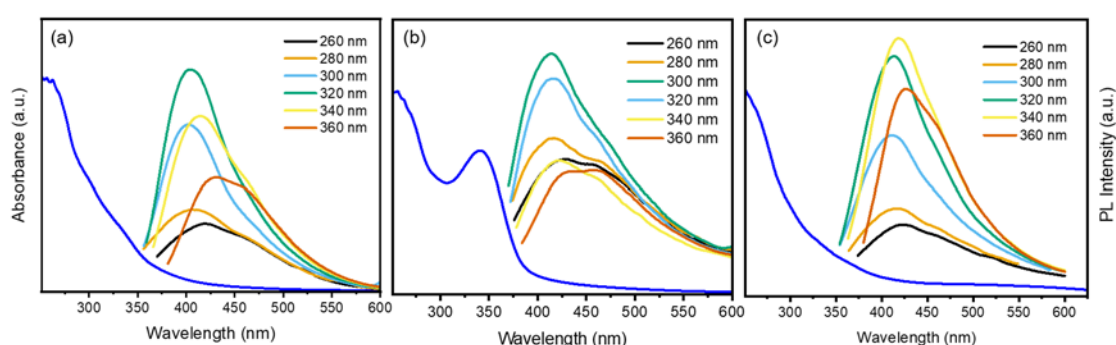

**Figure S1.** Absorption and PL spectra of the C-dots prepared using water as solvent (a): Indigo C-dots; (b): *Carcuma longa* C-dots; (c): *Sophora japonica* L. C-dots.

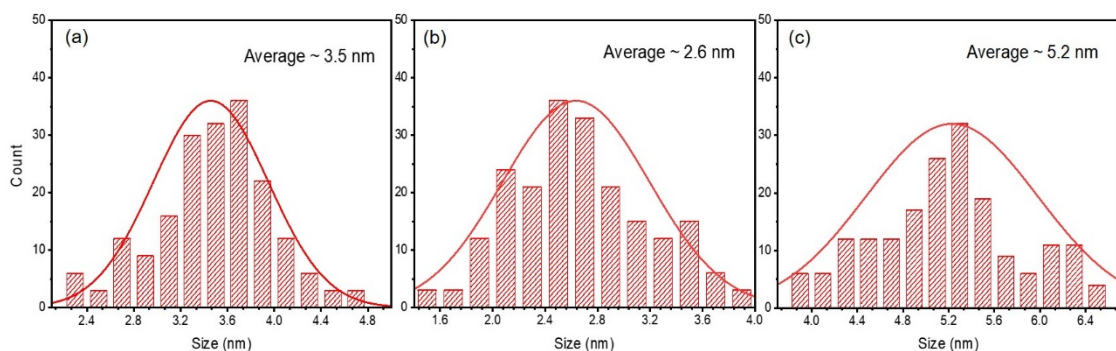

**Figure S2.** Diameter distribution of C-dots. (a): Indigo C-dots; (b): *Carcuma longa* C-dots; (c): *Sophora japonica* L. C-dots.

**Table S1.** Quantitative analysis results of XPS data for C-dots derived from different natural dyes.

| Sample                            | C (%) | O (%) | N (%) | Cl (%) | Si (%) | S (%) | Se (%) |
|-----------------------------------|-------|-------|-------|--------|--------|-------|--------|
| Indigo C-dots                     | 71.98 | 17.24 | 3.89  | 3.32   | 2.95   | 0.62  | 0      |
| <i>Carcuma longa</i> C-dots       | 78.54 | 17.21 | 1.68  | 0.46   | 1.61   | 0.49  | 0      |
| <i>Sophora japonica</i> L. C-dots | 64.47 | 26.56 | 5.92  | 2.89   | 0      | 0     | 0.17   |

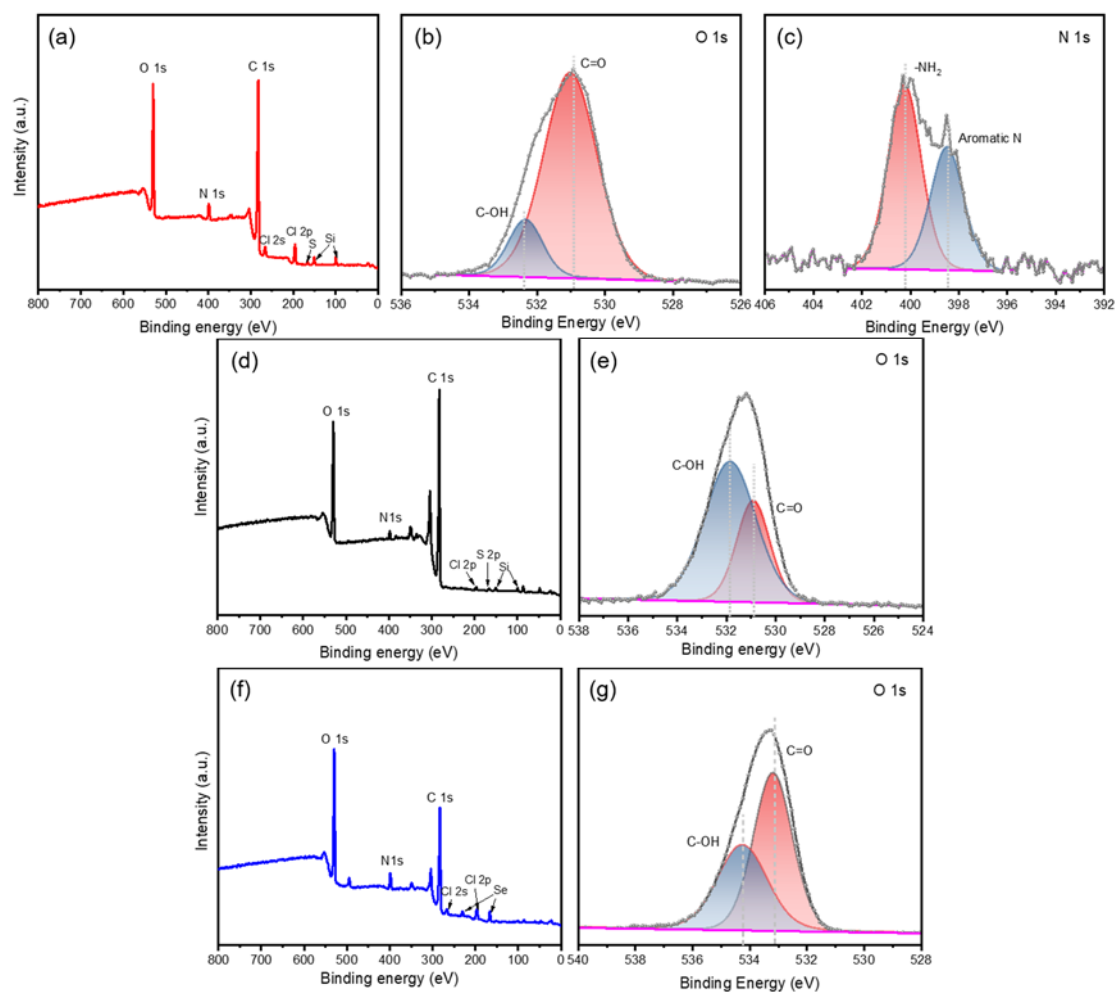

**Figure S3.** XPS full survey and high resolution XPS spectra. The C-dots were prepared using (a,b,c) Indigo, (d,e) *Carcuma longa*, and (f,g) *Sophora japonica* L.

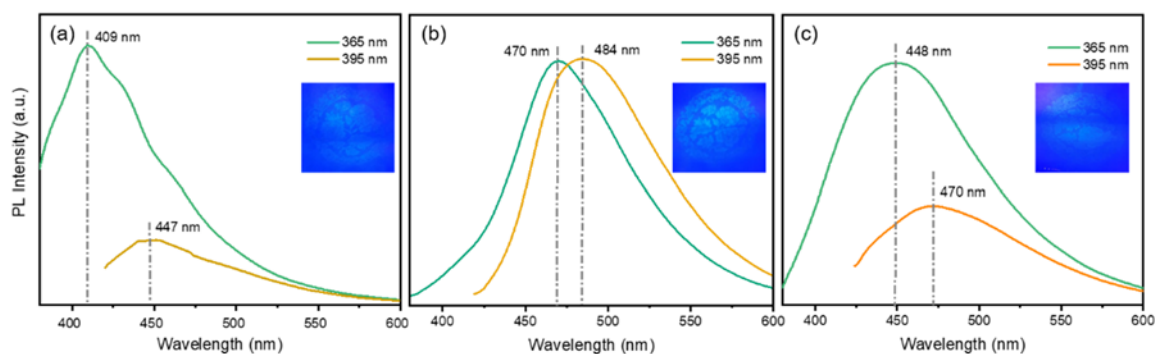

**Figure S4.** PL spectra of C-dots inks and printed patterns on folded flexible fabrics. The C-dots were derived from (a) Indigo; (b) *Carcuma longa* and (c) *Sophora japonica* L. Insets: the folded pattern on flexible cotton fabric under 395 nm illumination.

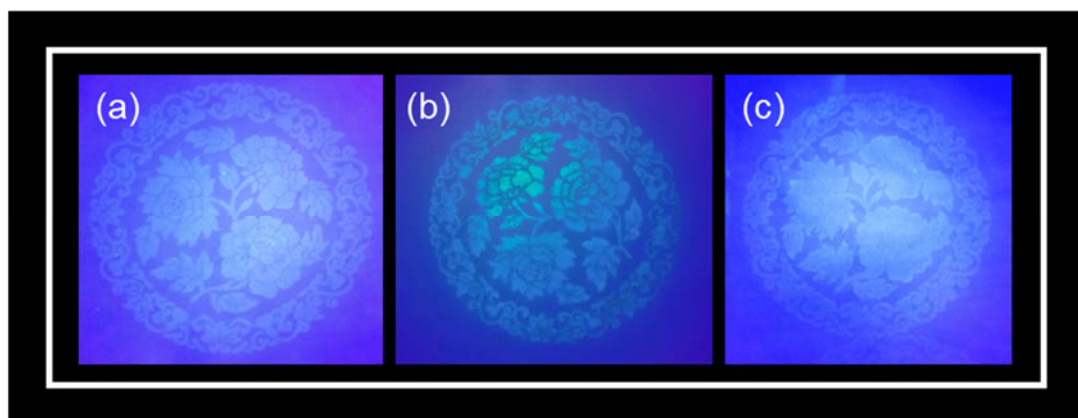

**Figure S5.** The printed anti-counterfeit patterns on cotton fabric after 3 months of storage upon 395 nm illumination. The C-dots were prepared using (a) Indigo, (b) *Carcuma longa*, and (c) *Sophora japonica* L.

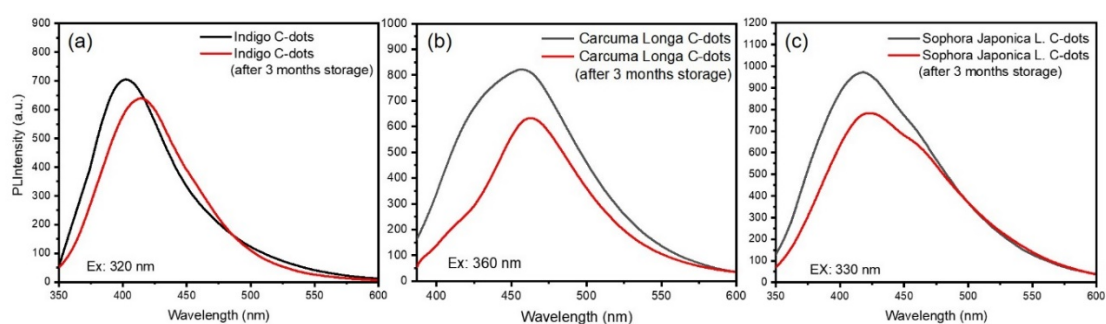

**Figure S6.** PL spectra of C-dots solution after 3 months of storage. The C-dots were prepared using (a) Indigo, (b) *Carcuma longa*, and (c) *Sophora japonica* L.

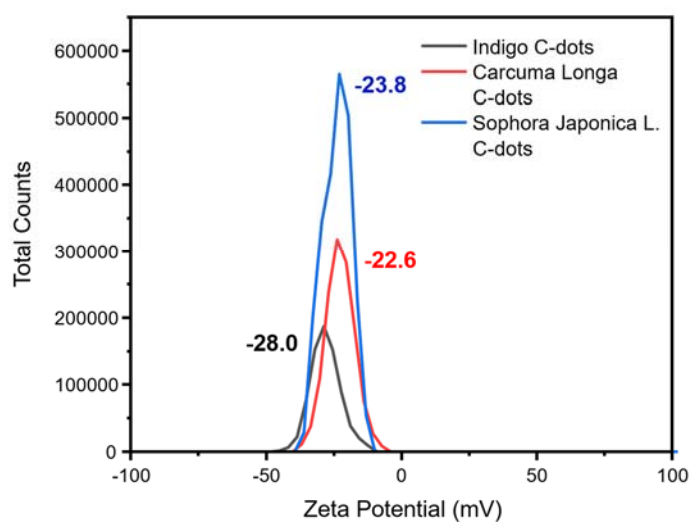

**Figure S7.** Zeta potential of C-dots derived from indigo, *Carcuma longa* and *Sophora japonica* L.
